# Supplementary material for: High-efficiency synthesis of enhanced-titanium and anatase-free TS-1 zeolite by using a crystallization modifier
Source: Royal Society of Chemistry journal article supplement (doi:10.1039/d1qi00311a), 2021-01-01
Supplement: d1qi00311a1.pdf [file d1qi00311a1.pdf]

## Supporting Information

### High-Efficiency Synthesis of Enhanced-Titanium and Anatase-Free TS-1 Zeolite by Using Crystallization Modifier

Jiani Zhang, ‡ Huaizhong Shi, ‡ Yue Song, Wenjing Xu, Xianyu Meng, Jiyang Li\*

State Key Laboratory of Inorganic Synthesis & Preparative Chemistry, College of Chemistry, Jilin University, Changchun 130012, P. R. China.

\* Corresponding author. E-mail address: [lijiyang@jlu.edu.cn](mailto:lijiyang@jlu.edu.cn)

‡ Equally contributed to this work.

|                                                                                |    |
|--------------------------------------------------------------------------------|----|
| Fig. S1 N <sub>2</sub> adsorption–desorption isotherms of NTS-61H and NTS-73H. | 2  |
| Fig. S2 The XPS spectra of Ti 2p of samples.                                   | 2  |
| Fig. S3 <sup>29</sup> Si MAS NMR spectra of NTS-61H and CTS-1.                 | 3  |
| Fig. S4 Photos of initial synthetic mixtures.                                  | 3  |
| Fig. S5 XRD patterns of NTS-0H-xh and NTS-61H-xh.                              | 4  |
| Fig. S6 TEM images of NTS-61H-xh.                                              | 4  |
| Fig. S7 TEM images of NTS-0H-xh.                                               | 5  |
| Fig. S8 Respective yields of Ti in NTS-0H-xh and NTS-61H-xh.                   | 5  |
| Fig. S9 UV-vis spectra of NTS-0H-xh and NTS-61H-xh.                            | 6  |
| Fig. S10 XRD patterns of CTS-yd and NTS-yd.                                    | 6  |
| Fig. S11 Relative crystallinity curves of CTS-yd and NTS-yd.                   | 7  |
| Fig. S12 UV-vis spectra of CTS-yd and NTS-yd.                                  | 7  |
| Table S1 Textural properties of CTS-1 and synthesized TS-1 samples.            | 8  |
| Table S2 Comparison of titanium-rich TS-1 synthesized by hydrothermal methods. | 9  |
| References                                                                     | 10 |

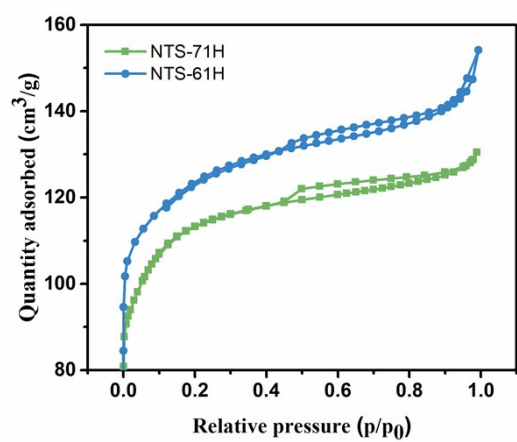

Fig. S1 N<sub>2</sub> adsorption–desorption isotherms of NTS-61H and NTS-73H.

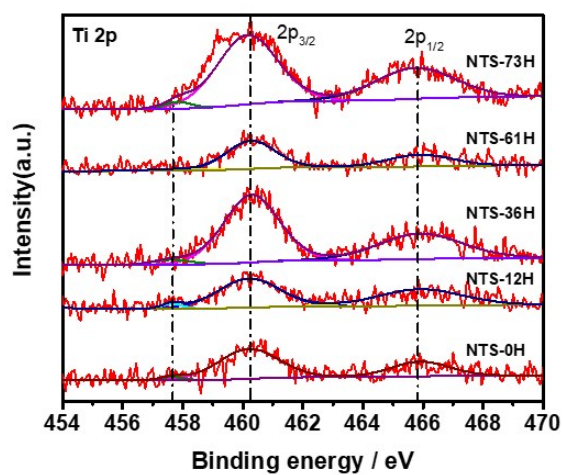

Fig. S2 The XPS spectra of Ti 2p of NTS-0H, NTS-12H, NTS-36H, NTS-61H and NTS-73H.

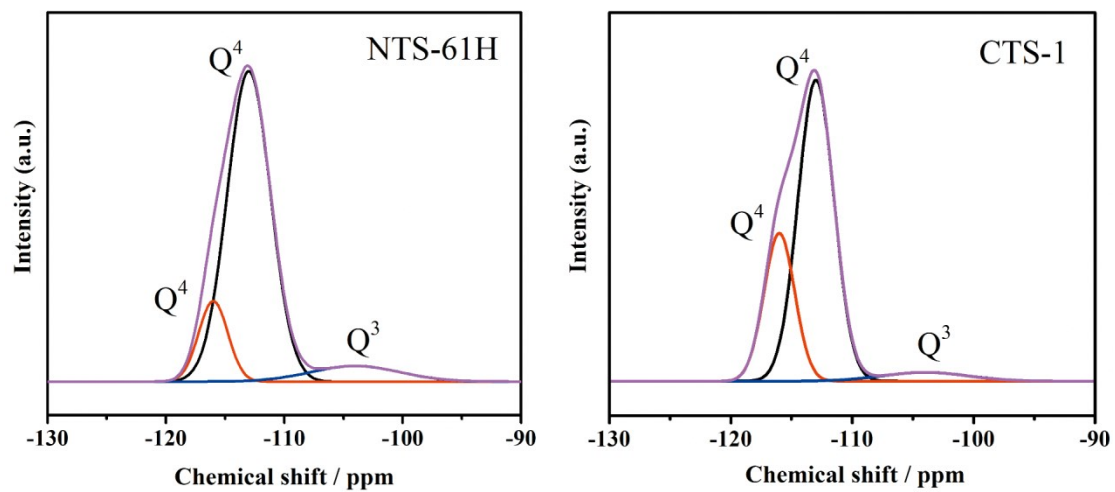

Fig. S3  $^{29}\text{Si}$  MAS NMR spectra of NTS-61H and CTS-1.

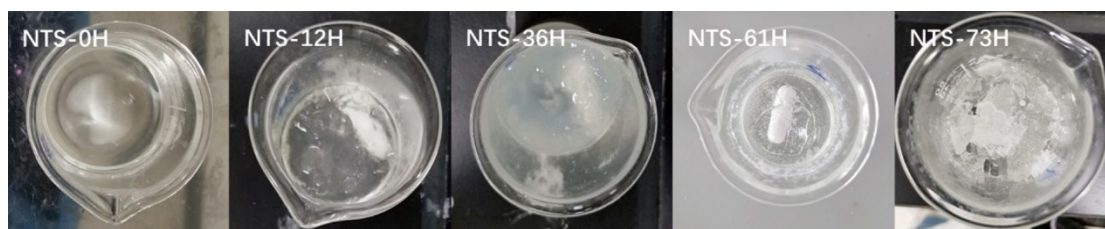

Fig. S4 Photos of initial synthetic mixtures with different amount of  $\text{H}_3\text{BTC}$ .

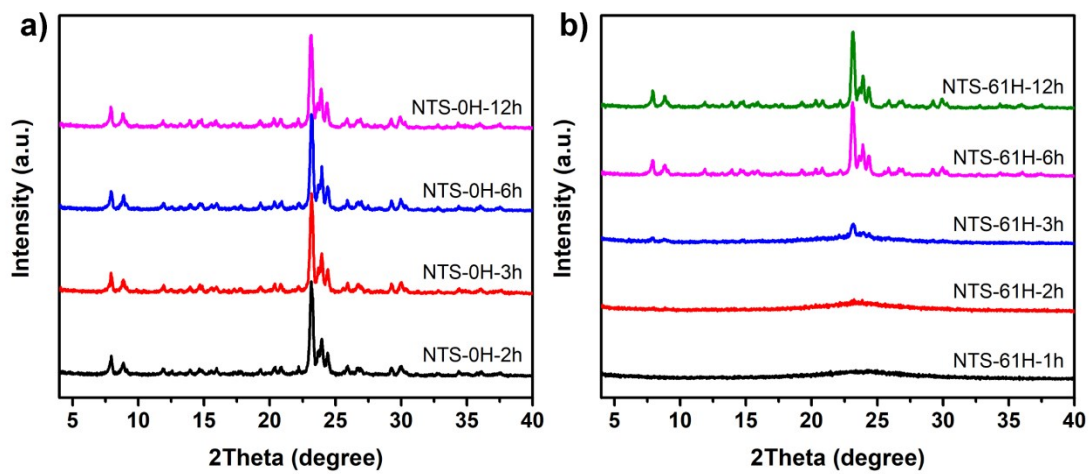

Fig. S5 XRD patterns of a) NTS-0H-xh samples and b) NTS-61H-xh samples.

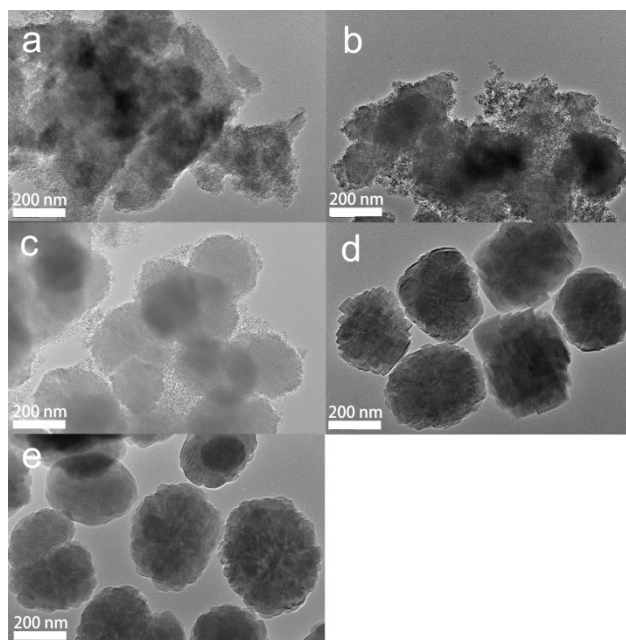

Fig. S6 TEM images of a) NTS-61H-1h, b) NTS-61H-2h, c) NTS-61H-3h, d) NTS-61H-6h, e) NTS-61H-12h.

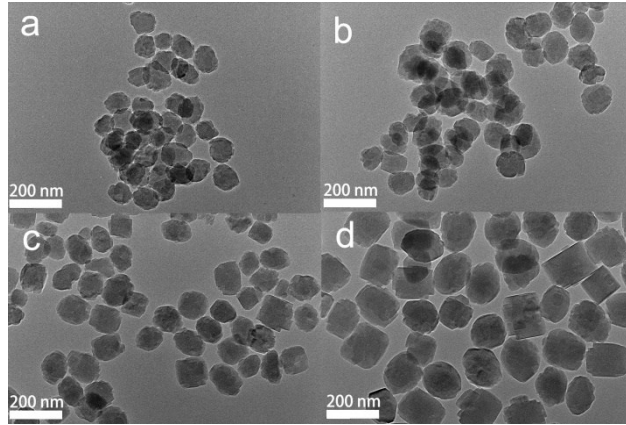

Fig. S7 TEM images of a) NTS-0H-2h, b) NTS-0H-3h, c) NTS-0H-6h, d) NTS-0H-12h.

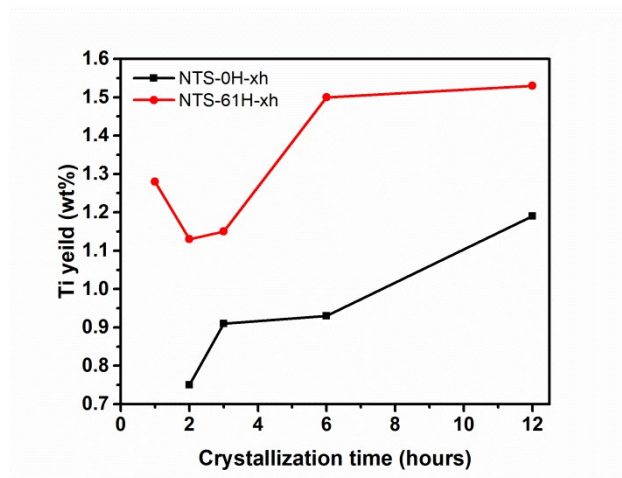

Fig. S8 Respective yields of Ti in NTS-0H-xh and NTS-61H-xh.

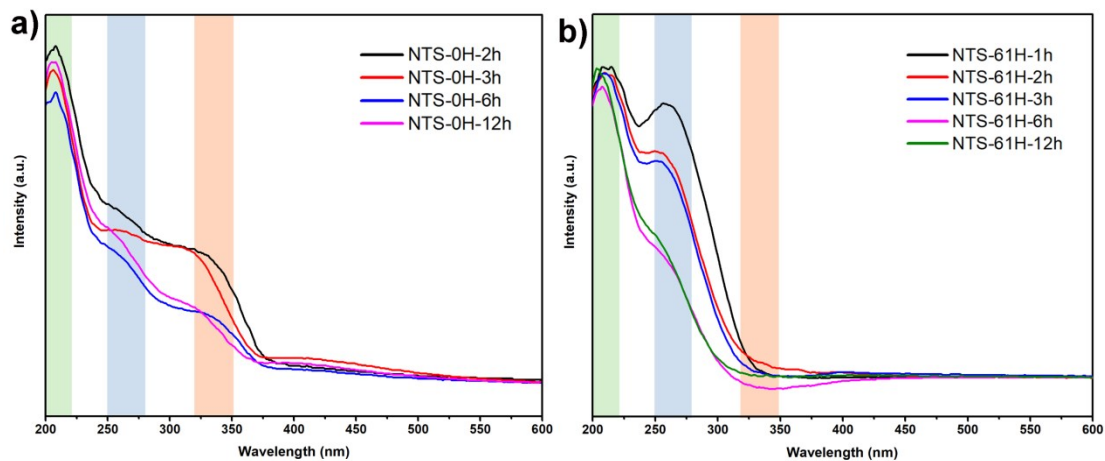

Fig. S9 UV-vis spectra of a) NTS-0H-xh and b) NTS-61H-xh.

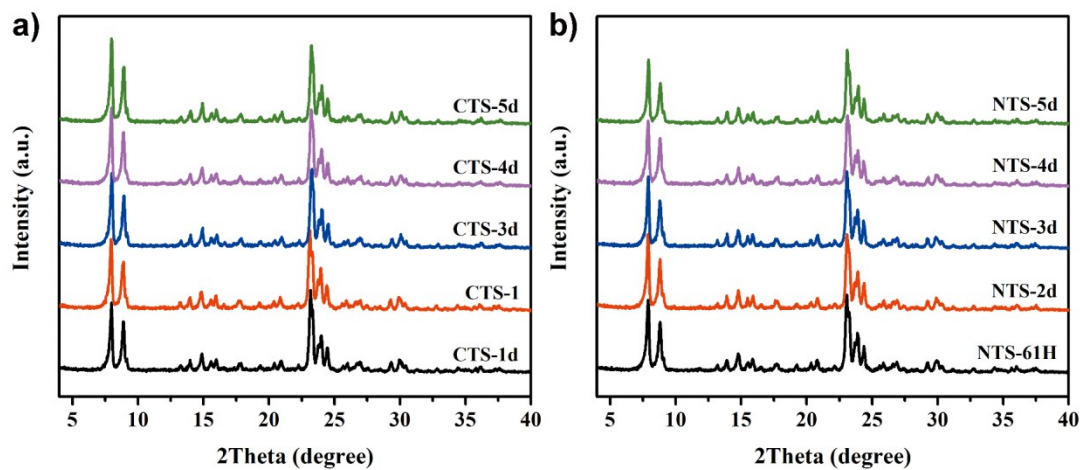

Fig. S10 XRD patterns of a) CTS-yd samples and b) NTS-yd samples.

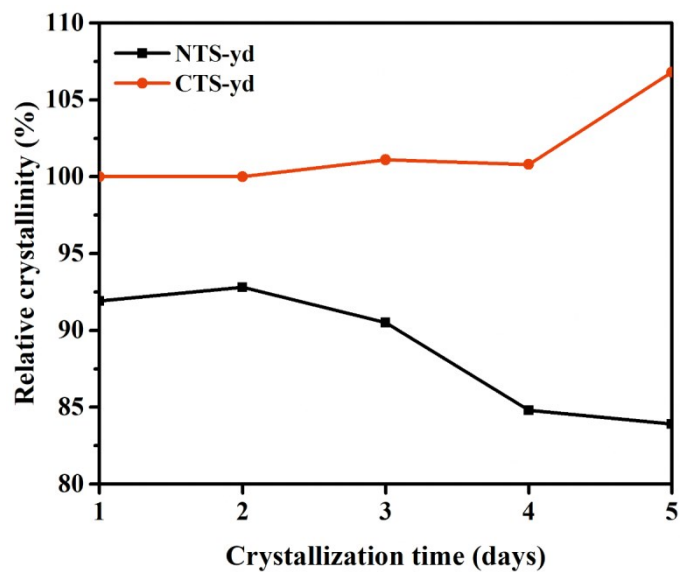

Fig. S11 Relative crystallinity curves of CTS-yd samples and NTS-yd samples (the crystallinity of CTS-1 as the standard 100%).

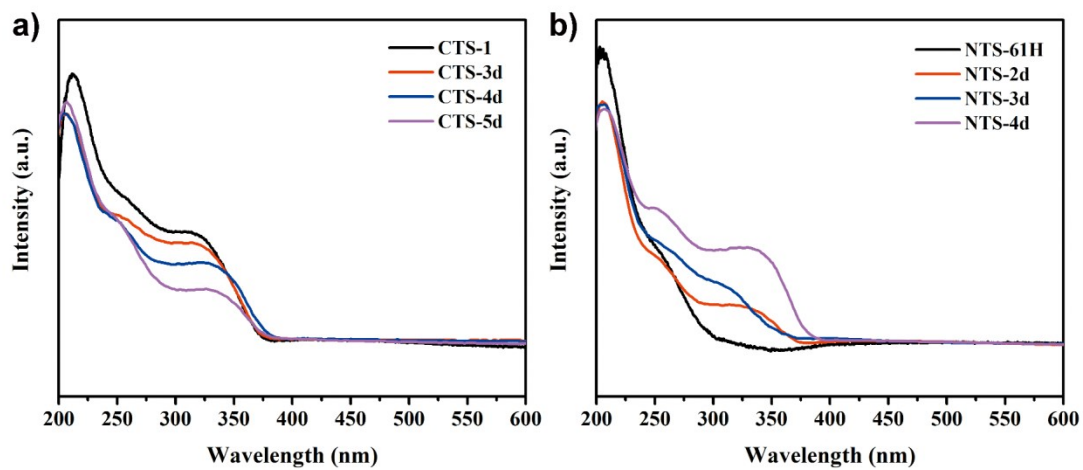

Fig. S12 UV-vis spectra of CTS-yd samples and NTS-yd samples.

Table S1 Textural properties of CTS-1 and synthesized TS-1 samples.

|         | $S_{\text{BET}}$                        | $S_{\text{micro}}$                      | $S_{\text{ext}}$                        | $V_{\text{total}}$                       | $V_{\text{micro}}$                       | $V_{\text{meso}}$                        |
|---------|-----------------------------------------|-----------------------------------------|-----------------------------------------|------------------------------------------|------------------------------------------|------------------------------------------|
|         | $(\text{m}^2 \text{g}^{-1})^{\text{a}}$ | $(\text{m}^2 \text{g}^{-1})^{\text{b}}$ | $(\text{m}^2 \text{g}^{-1})^{\text{b}}$ | $(\text{cm}^3 \text{g}^{-1})^{\text{c}}$ | $(\text{cm}^3 \text{g}^{-1})^{\text{d}}$ | $(\text{cm}^3 \text{g}^{-1})^{\text{e}}$ |
| CTS-1   | 385                                     | 278                                     | 108                                     | 0.24                                     | 0.13                                     | 0.11                                     |
| NTS-0H  | 397                                     | 264                                     | 133                                     | 0.28                                     | 0.12                                     | 0.16                                     |
| NTS-12H | 391                                     | 221                                     | 169                                     | 0.46                                     | 0.12                                     | 0.34                                     |
| NTS-36H | 393                                     | 224                                     | 169                                     | 0.39                                     | 0.12                                     | 0.27                                     |
| NTS-61H | 358                                     | 230                                     | 128                                     | 0.24                                     | 0.13                                     | 0.11                                     |
| NTS-73H | 344                                     | 218                                     | 126                                     | 0.20                                     | 0.12                                     | 0.08                                     |

<sup>a</sup> Surface area was calculated from the nitrogen adsorption isotherm using the BET method.

<sup>b</sup>  $S_{\text{micro}}$  (micropore area),  $S_{\text{ext}}$  (external surface area) were calculated using the t-plot method.

<sup>c</sup>  $V_{\text{total}}$  (total pore volume) at  $P/P_0 = 0.99$ .

<sup>d</sup>  $V_{\text{micro}}$  (micropore volume) was calculated using the t-plot method.

<sup>e</sup>  $V_{\text{meso}}$  (mesopore volume) =  $V_{\text{total}}$  (total pore volume) -  $V_{\text{micro}}$ .



Table S2 Comparison of titanium-rich TS-1 synthesized by the hydrothermal methods.

| Crystallization modifier                        | Synthetic method                        | Si/Ti              | Ti wt%                 | Time-gel. (hours) <sup>d</sup> | Crystallization temperature (°C) | Time-cry. (days) <sup>e</sup> | Ref.      |
|-------------------------------------------------|-----------------------------------------|--------------------|------------------------|--------------------------------|----------------------------------|-------------------------------|-----------|
| H <sub>3</sub> BTC                              | Hydrothermal method                     | 48.5 <sup>a</sup>  |                        | 4.5                            | 180                              | 1                             | This work |
| (NH <sub>4</sub> ) <sub>2</sub> CO <sub>3</sub> | Hydrothermal method                     | 65-66 <sup>b</sup> |                        | >2.5                           | 160                              | 3                             | 1         |
| (NH <sub>4</sub> ) <sub>2</sub> CO <sub>3</sub> | Hydrothermal method and post-treatments | 34 <sup>a</sup>    |                        |                                | 170                              | 6                             | 2         |
| (NH <sub>4</sub> ) <sub>2</sub> CO <sub>3</sub> | Hydrothermal method and post-treatments | 43.1 <sup>a</sup>  |                        | >4.5                           | 170                              | 6                             | 3         |
| PAA                                             | Hydrothermal method                     | 44 <sup>a</sup>    |                        | >0.5                           | 170                              | 7                             | 4         |
| IPA                                             | Hydrothermal method                     |                    | 3.08-9.92 <sup>c</sup> | >8.5                           | 170                              | 7                             | 5         |
| Triton X-100                                    | Rotation hydrothermal method            | 33.9 <sup>a</sup>  |                        | >8                             | 170                              | 4                             | 6         |

<sup>a</sup> The elemental compositions in the bulk were determined by ICP; <sup>b</sup> Molar ratio of Si to Ti was determined by energy dispersive X-ray spectroscopy (EDS); <sup>c</sup> The percentage content of titanium in the catalysts was determined by XRF method; <sup>d</sup> Time of gel preparation; <sup>e</sup> Time of hydrothermal crystallization.

## References

1. M. Shakeri and S. B. Dehghanpour, Rational synthesis of TS-1 zeolite to direct both particle size and framework Ti in favor of enhanced catalytic performance, *Microporous Mesoporous Mater.*, 2020, **298**, 110066.
2. W. Fan, R.-G. Duan, T. Yokoi, P. Wu, Y. Kubota and T. Tatsumi, Synthesis, crystallization mechanism, and catalytic properties of titanium-rich TS-1 free of extraframework titanium species, *J. Am. Chem. Soc.*, 2008, **130**, 10150-10164.
3. W. Jiao, Y. He, J. Li, J. Wang, T. Tatsumi and W. Fan, Ti-rich TS-1: A highly active catalyst for epoxidation of methallyl chloride to 2-methyl epichlorohydrin, *Appl. Catal., A*, 2015, **491**, 78-85.
4. J. Wang, Y. Zhao, T. Yokoi, J. N. Kondo and T. Tatsumi, High-Performance Titanosilicate Catalyst Obtained through Combination of Liquid-Phase and Solid-Phase Transformation Mechanisms, *Chemcatchem*, 2014, **6**, 2719-2726.
5. A. Wroblewska, J. Tolpa, D. Klosin, P. Miadlicki, Z. C. Koren and B. Michalkiewicz, The application of TS-1 materials with different titanium contents as catalysts for the autoxidation of alpha-pinene, *Microporous Mesoporous Mater.*, 2020, **305**, 110384.
6. T. Zhang, X. Chen, G. Chen, M. Chen, R. Bai, M. Jia and J. Yu, Synthesis of anatase-free nano-sized hierarchical TS-1 zeolites and their excellent catalytic performance in alkene epoxidation, *J. Mater. Chem. A*, 2018, **6**, 9473-9479.
